# Supplementary material for: A Bifunctional Peptide Conjugate That Controls Infections of Erwinia amylovora in Pear Plants
Source: MDPI journal article supplement (doi:10.3390/molecules26113426), 2021-06-05

## Supporting Information

# A bifunctional peptide conjugate that controls infections of *Erwinia amylovora* in pear plants

Pau Caravaca-Fuentes, Cristina Camó, Àngel Oliveras, Aina Baró, Jesús Francés, Esther  
Badosa, Marta Planas, Lidia Feliu, Emilio Montesinos and Anna Bonaterra\*

### Table of contents:

1. Characterization of peptides **BP16** and **flg15**: HPLC, ESI-MS and HRMS.....2
2. Characterization of peptide conjugates **BP358** and **BP359**: HPLC, ESI-MS and HRMS.....8

# 1. Characterization of peptides BP16 and flg15

## Lys-Lys-Leu-Phe-Lys-Lys-Ile-Leu-Lys-Lys-Leu-NH<sub>2</sub> (BP16)

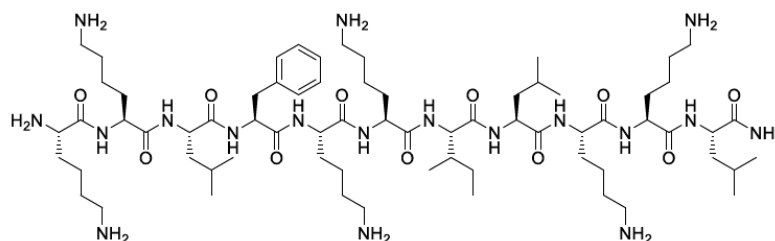

HPLC ( $\lambda=220$  nm)

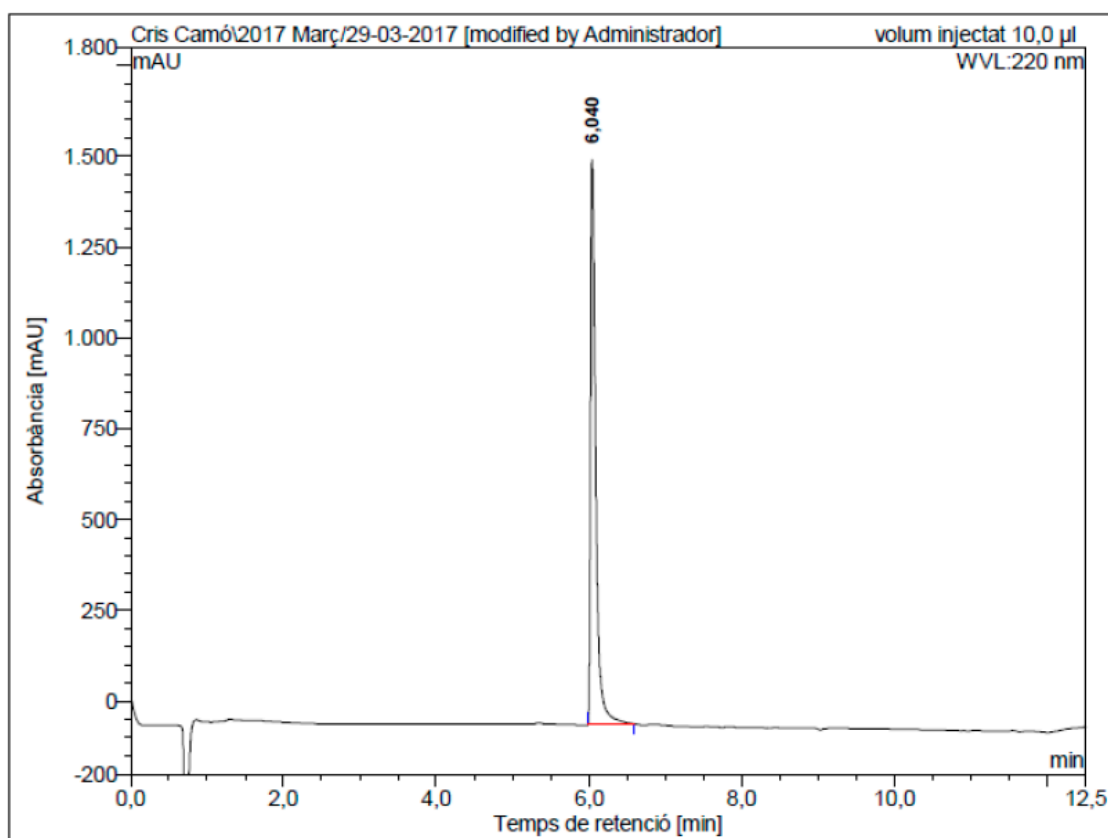

| No.    | Temps retenció<br>min | alçada<br>mAU | Area<br>mAU*min | Area relativa<br>% |
|--------|-----------------------|---------------|-----------------|--------------------|
| 1      | 6,04                  | 1551,826      | 121,114         | 100,00             |
| Total: |                       | 1551,826      | 121,114         | 100,00             |

### ESI-MS ( $m/z$ )

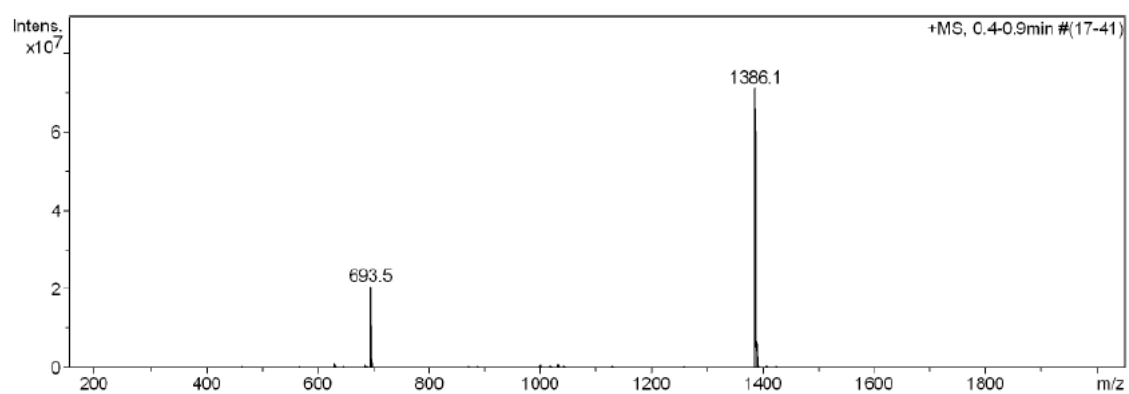

### HRMS ( $m/z$ )

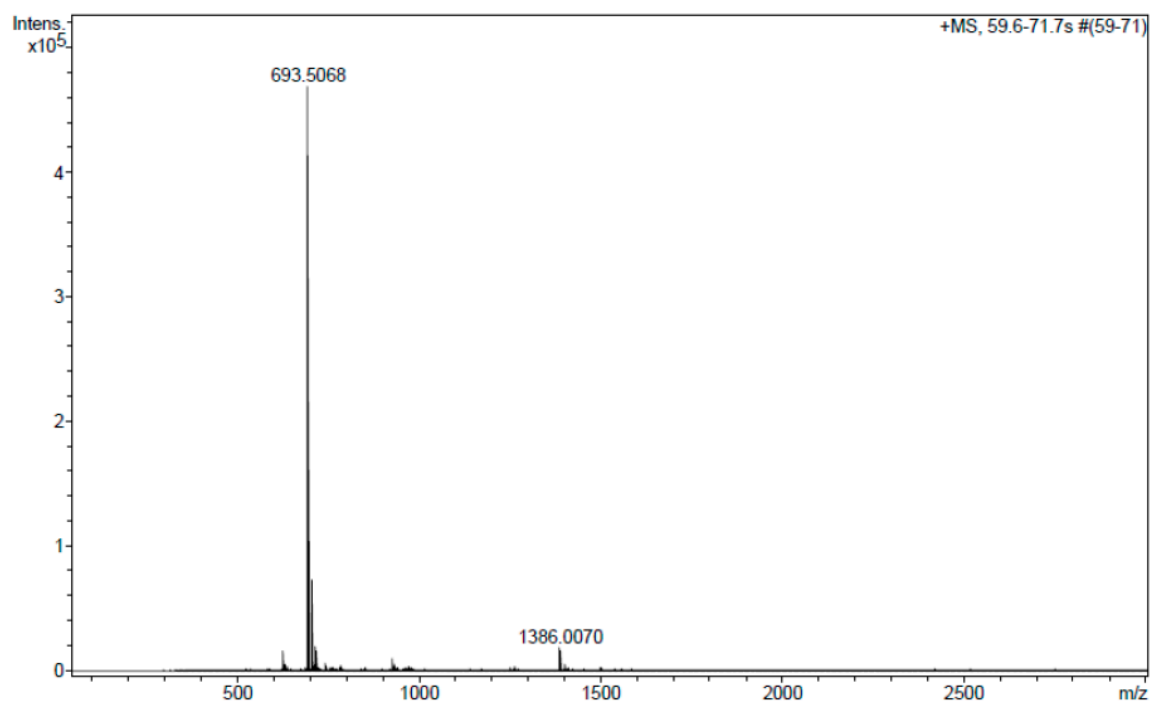

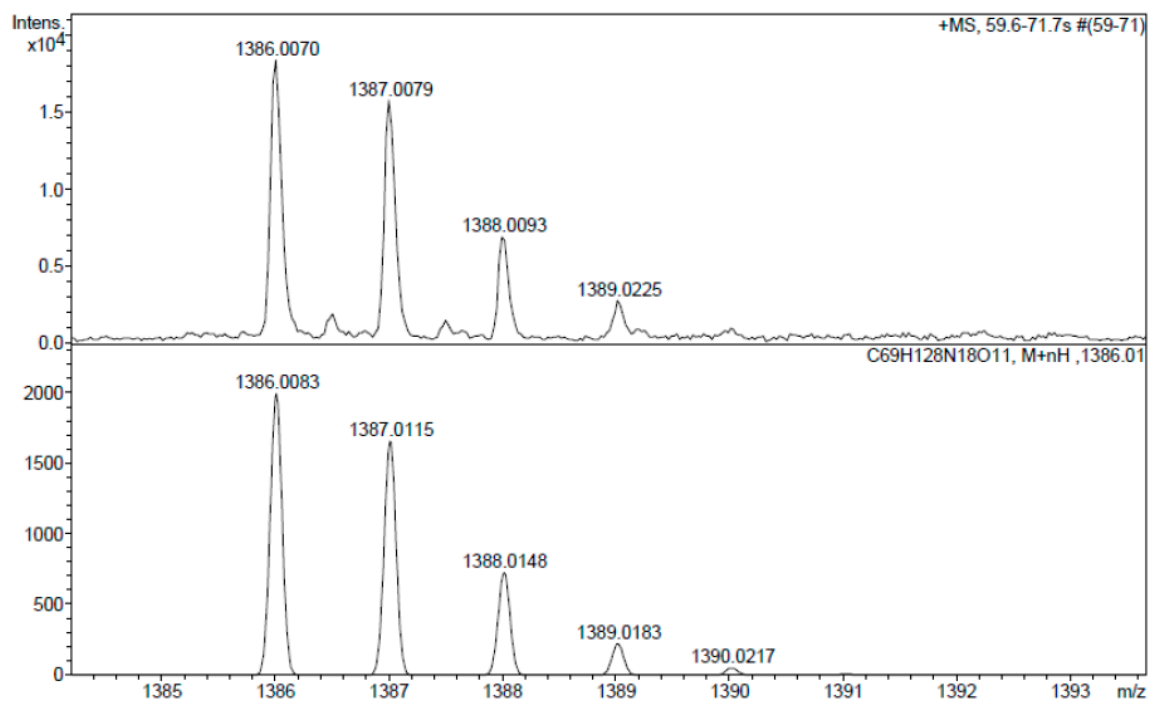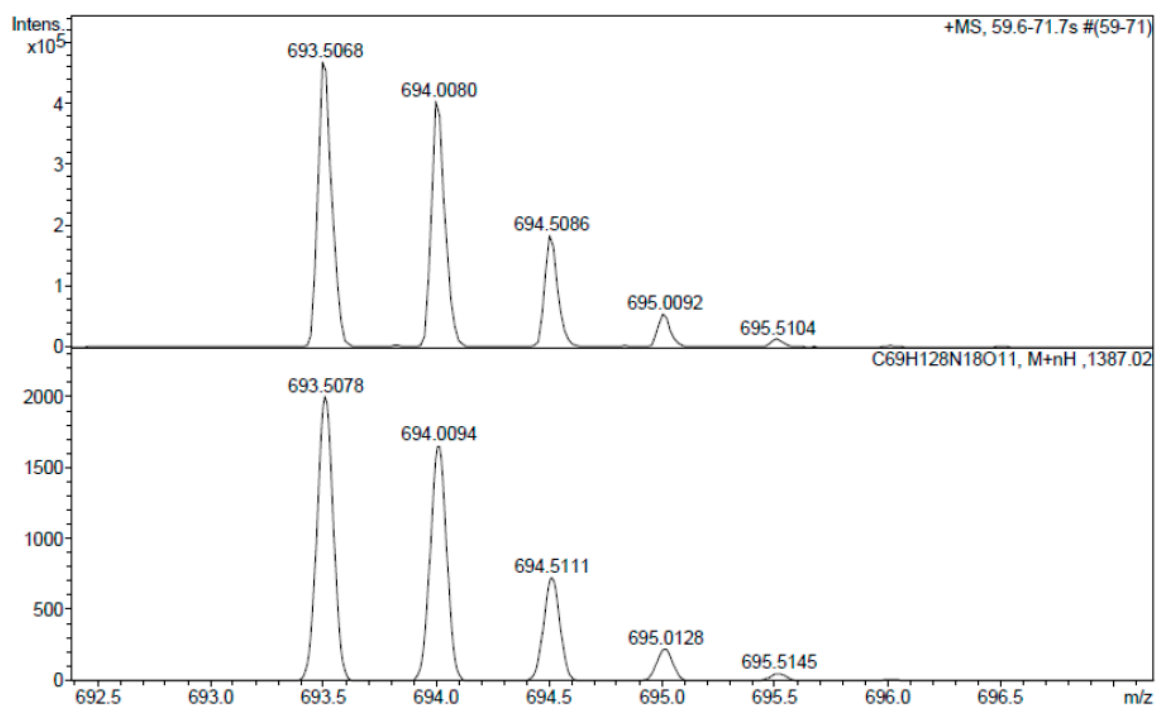

**Arg-Ile-Asn-Ser-Ala-Lys-Asp-Asp-Ala-Ala-Gly-Leu-Gln-Ile-Ala-OH (flg15)**

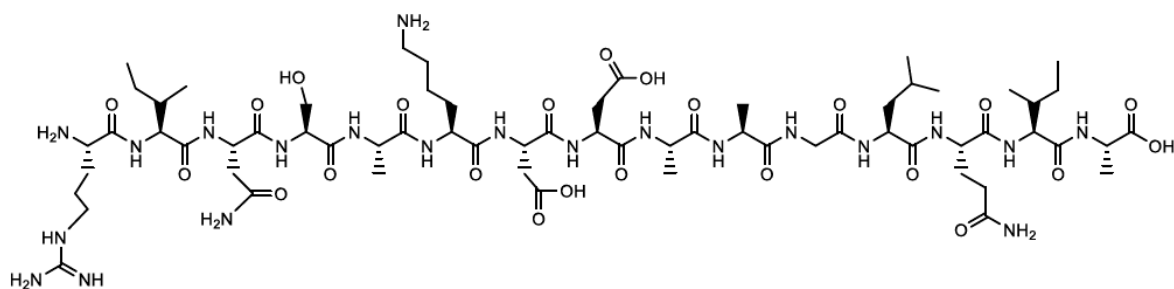

HPLC ( $\lambda=220$  nm)

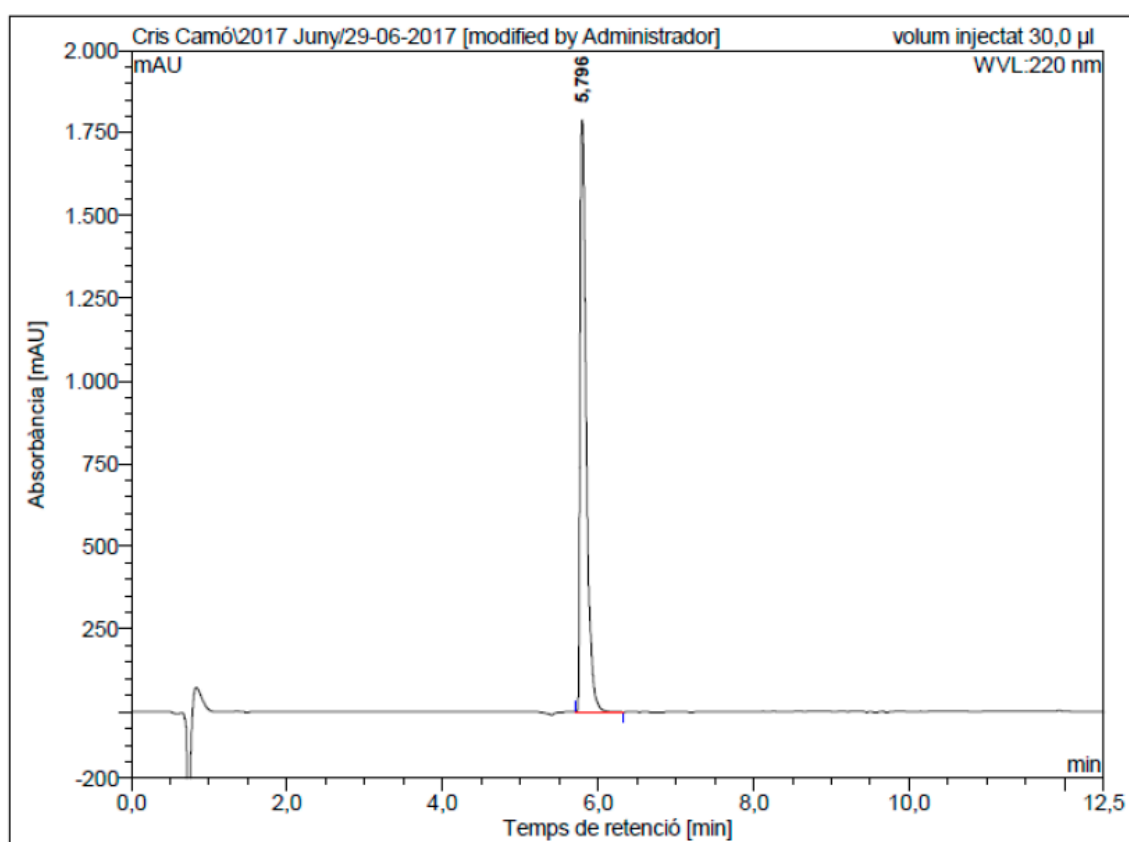

| No.    | Temps retenció<br>min | alçada<br>mAU | Area<br>mAU*min | Area relativa<br>% |
|--------|-----------------------|---------------|-----------------|--------------------|
| 1      | 5,80                  | 1790,703      | 165,501         | 100,00             |
| Total: |                       | 1790,703      | 165,501         | 100,00             |

### ESI-MS ( $m/z$ )

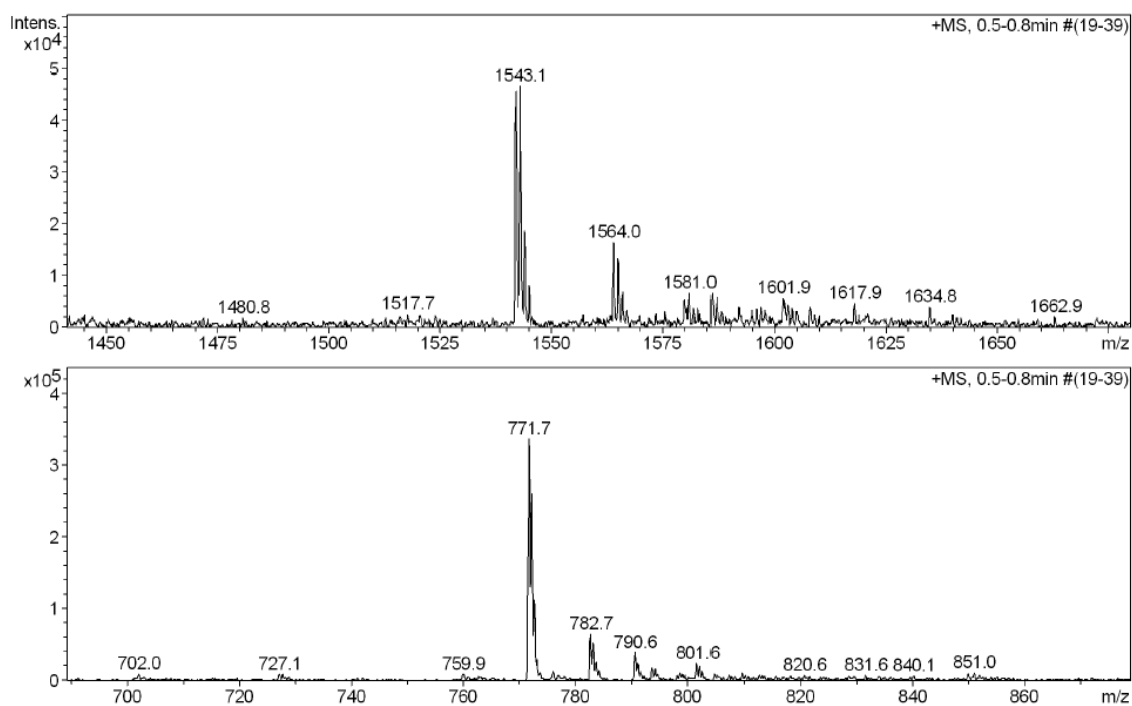

### HRMS ( $m/z$ )

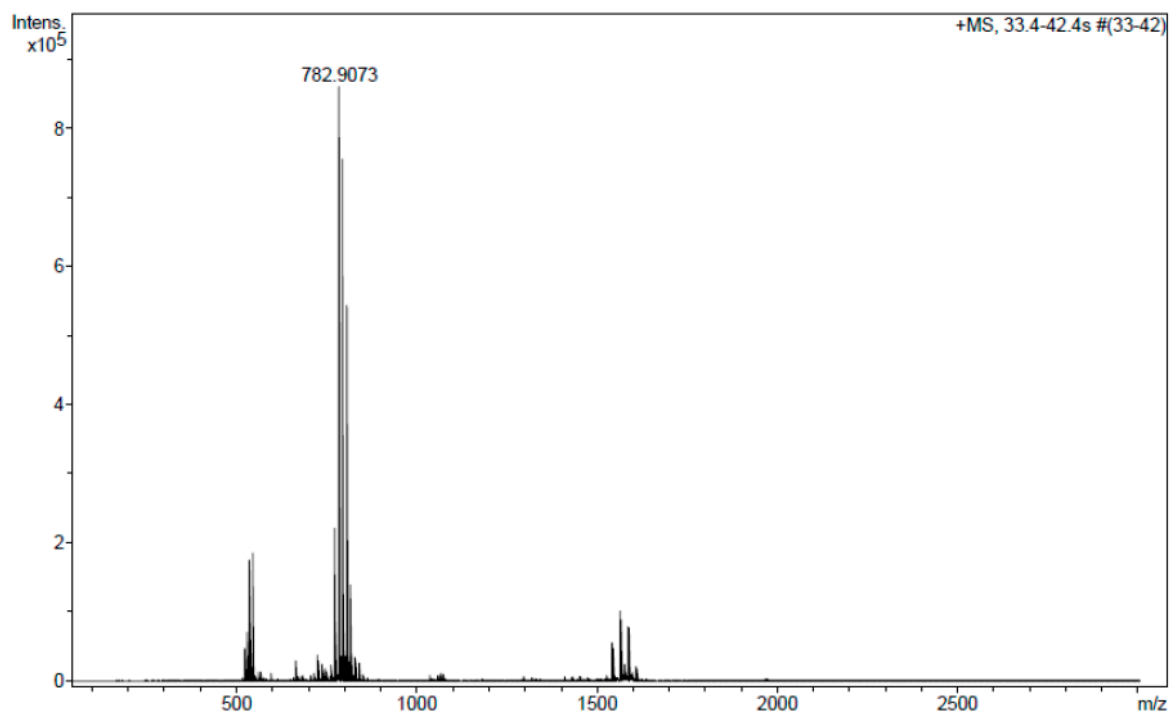

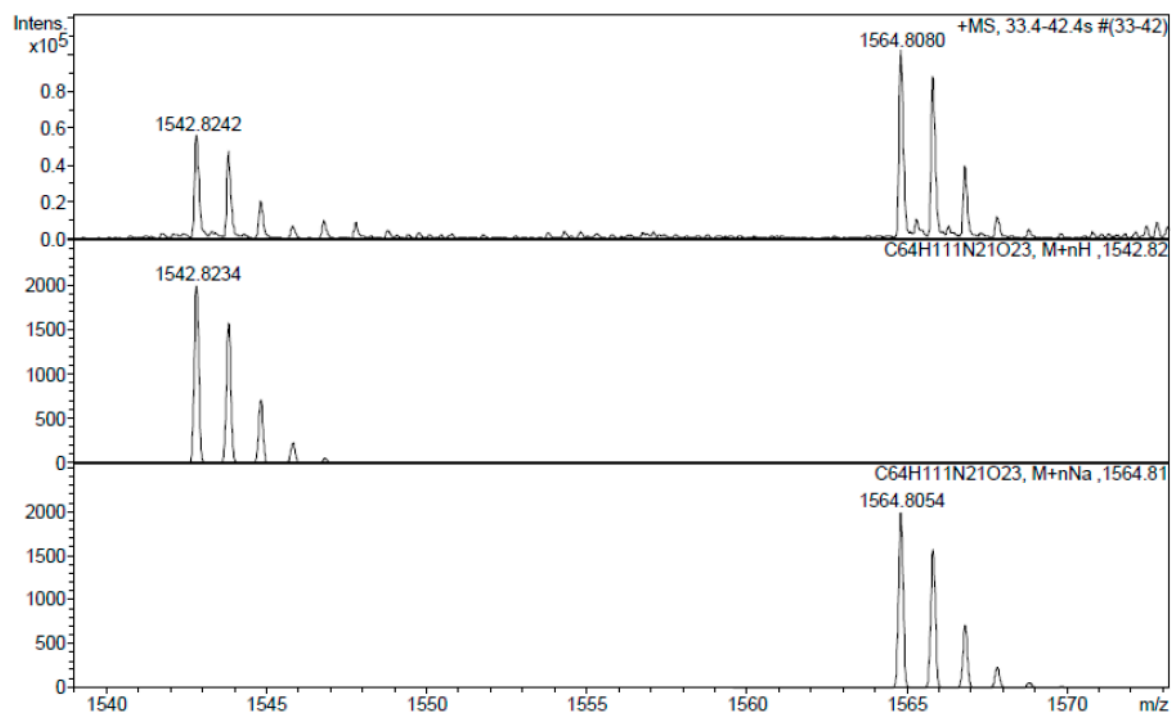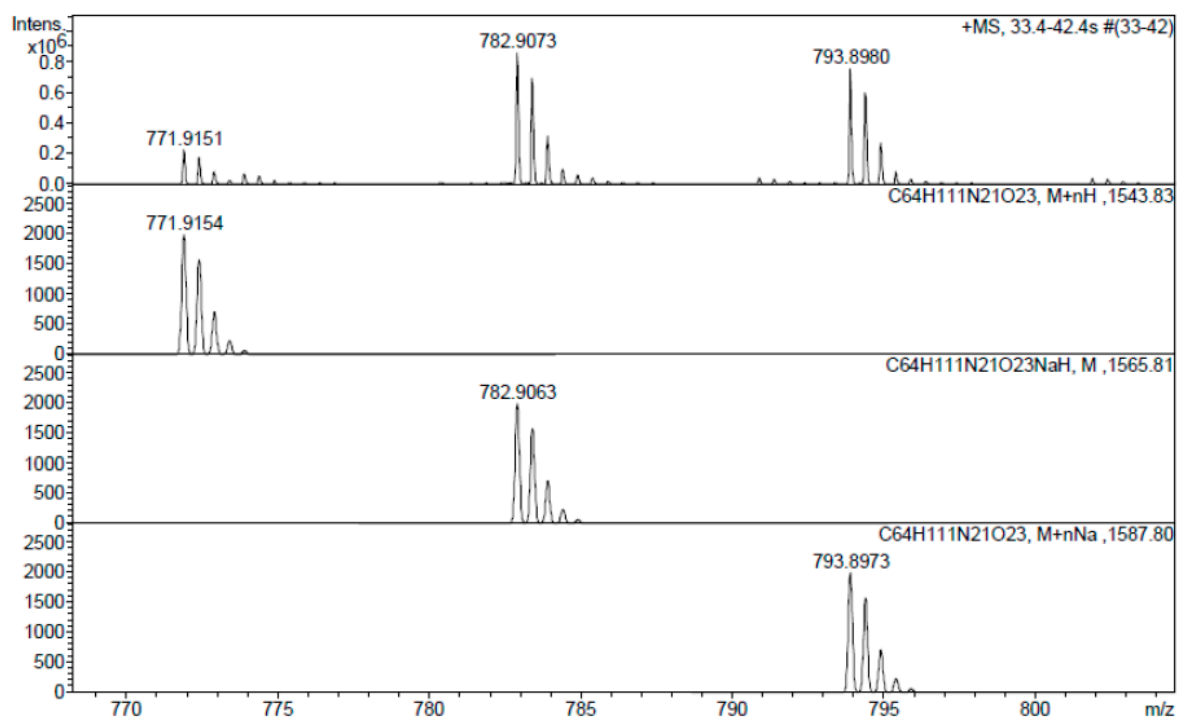

## 2. Characterization of peptide conjugates BP358 and BP359

Arg-Ile-Asn-Ser-Ala-Lys-Asp-Asp-Ala-Ala-Gly-Leu-Gln-Ile-Ala-Lys-Lys-Leu-Phe-Lys-Lys-Ile-Leu-Lys-Lys-Leu-NH<sub>2</sub> (BP358)

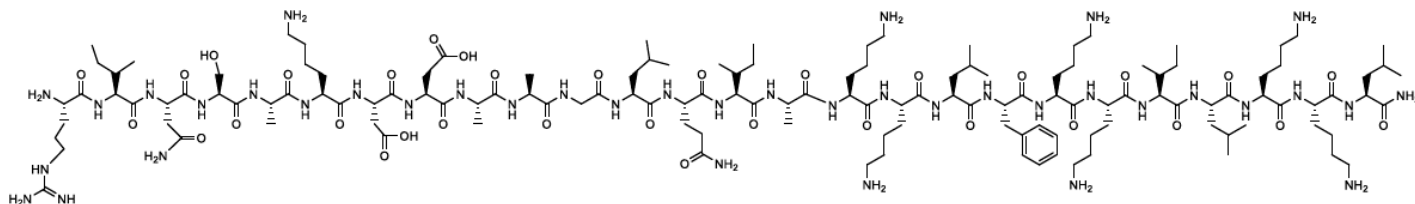

HPLC ( $\lambda=220$  nm)

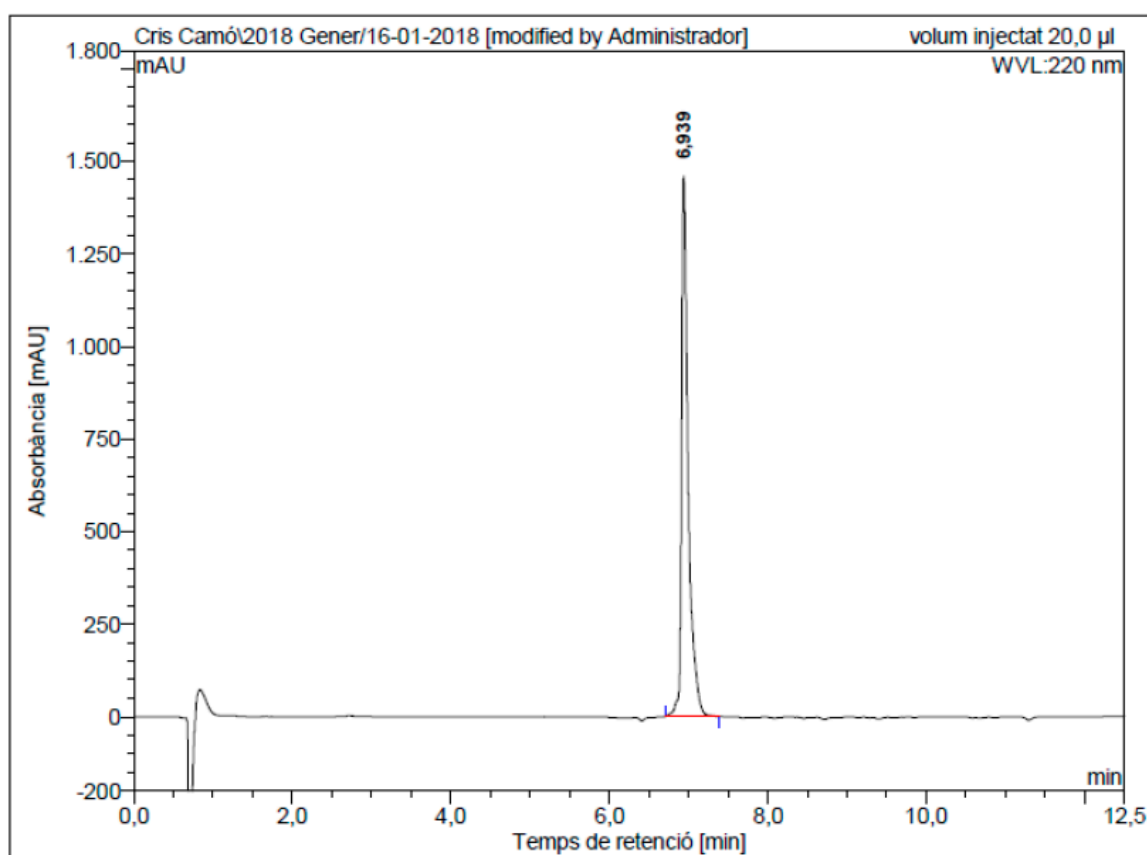

| No.    | Temps retenció<br>min | alçada<br>mAU | Area<br>mAU*min | Area relativa<br>% |
|--------|-----------------------|---------------|-----------------|--------------------|
| 1      | 6,94                  | 1457,802      | 142,886         | 100,00             |
| Total: |                       | 1457,802      | 142,886         | 100,00             |



### ESI-MS ( $m/z$ )

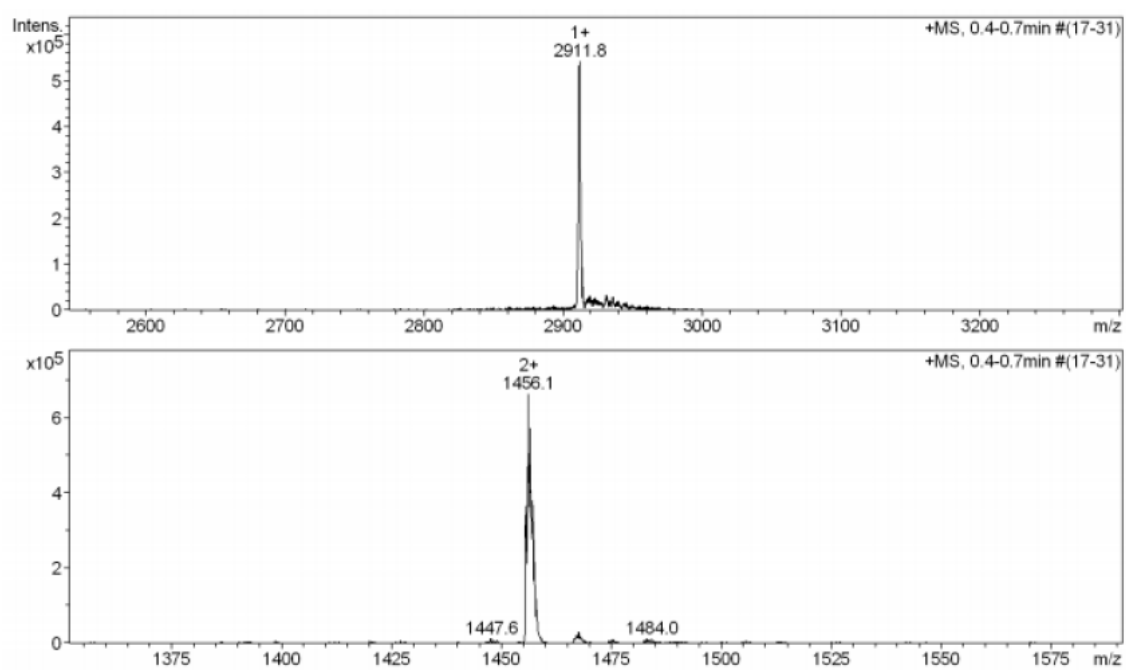

### HRMS ( $m/z$ )

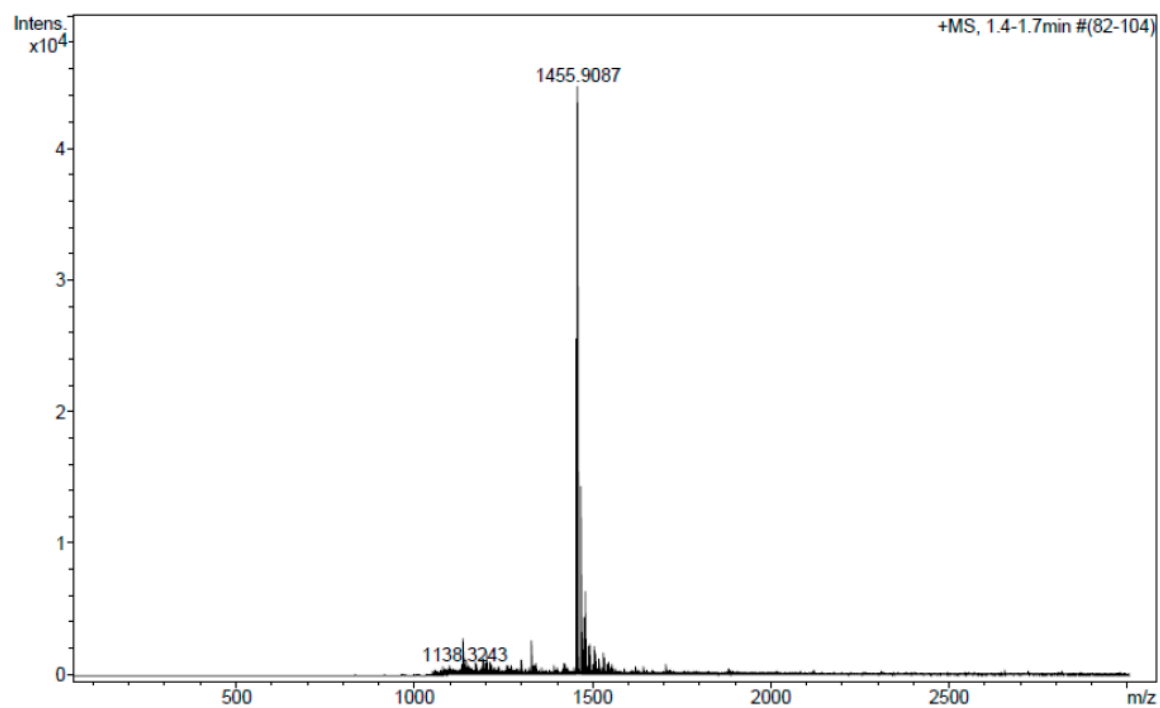

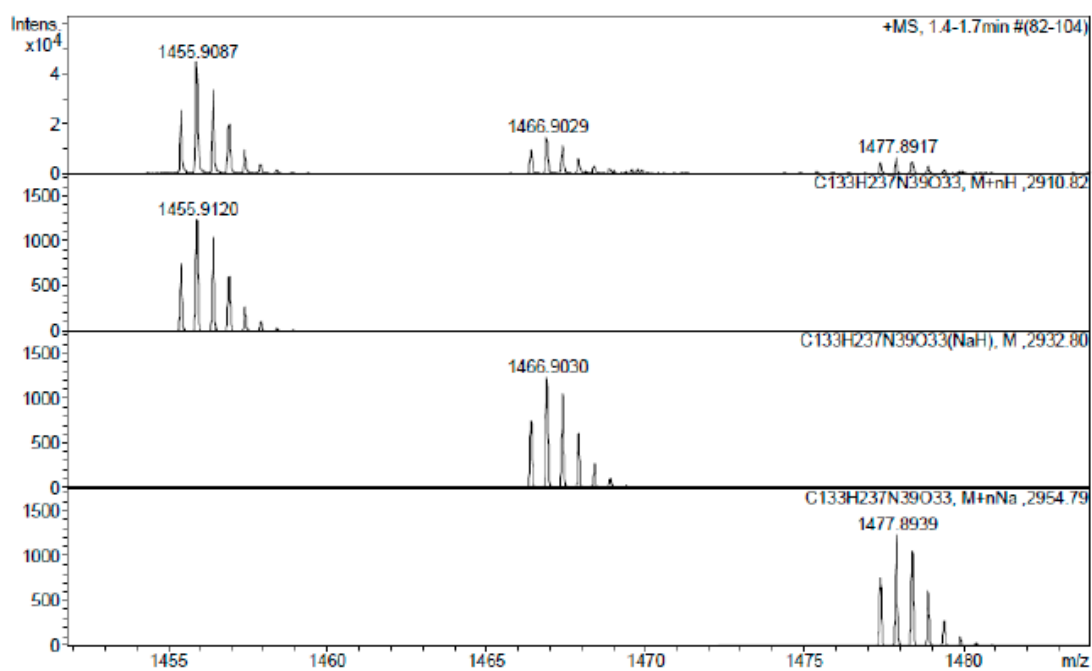

**Lys-Lys-Leu-Phe-Lys-Lys-Ile-Leu-Lys-Lys-Leu-Arg-Ile-Asn-Ser-Ala-Lys-Asp-Asp-Ala-Ala-Gly-Leu-Gln-Ile-Ala-OH (BP359)**

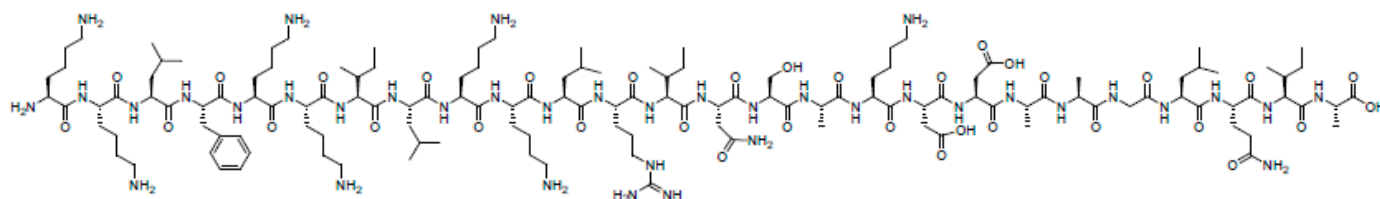

HPLC ( $\lambda=220$  nm)

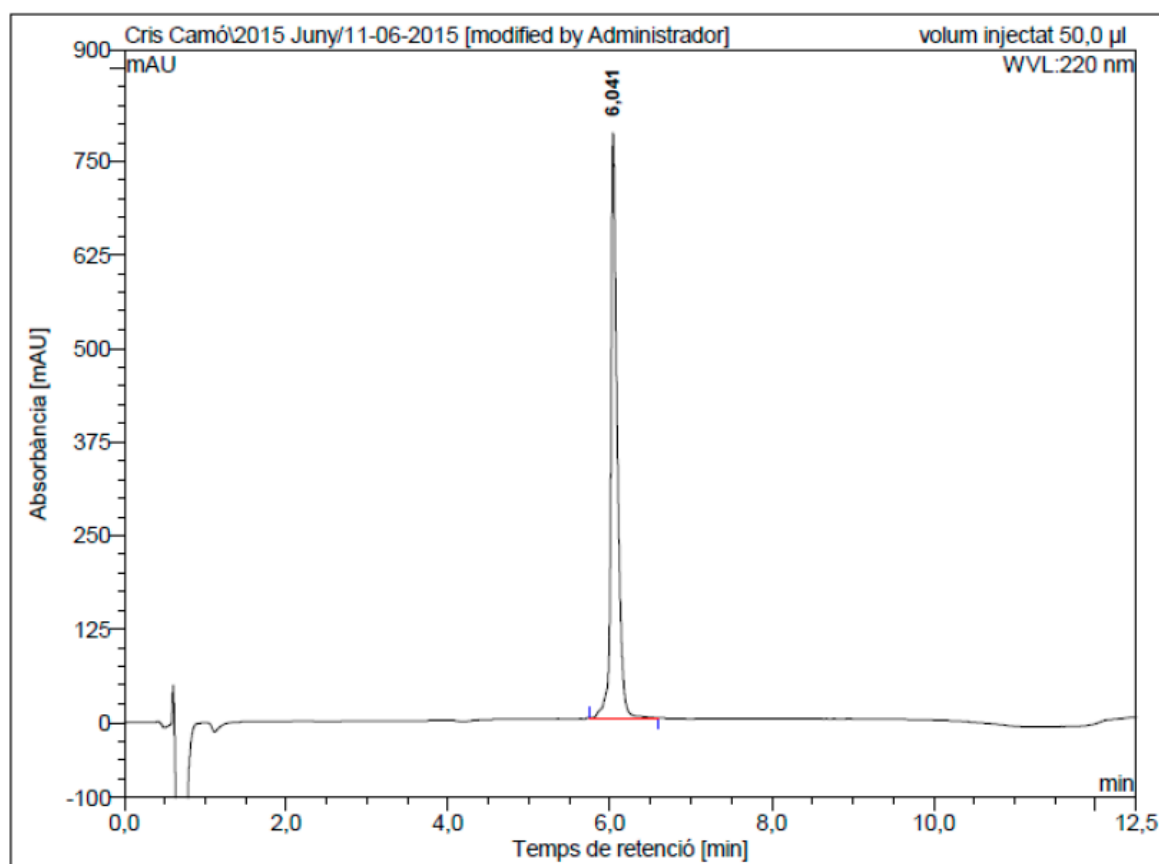

| No.    | Temps retenció<br>min | alçada<br>mAU | Area<br>mAU*min | Area relativa<br>% |
|--------|-----------------------|---------------|-----------------|--------------------|
| 1      | 6,04                  | 782,370       | 71,301          | 100,00             |
| Total: |                       | 782,370       | 71,301          | 100,00             |

### ESI-MS ( $m/z$ )

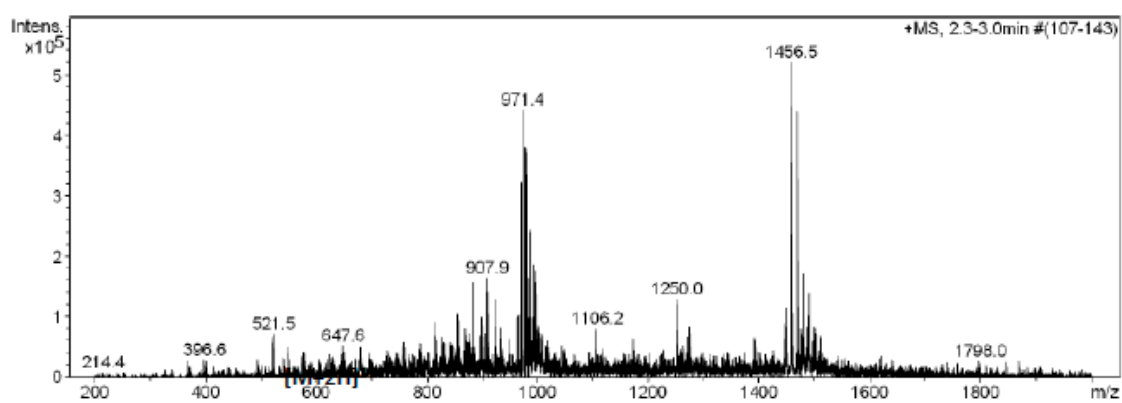

### HRMS ( $m/z$ )

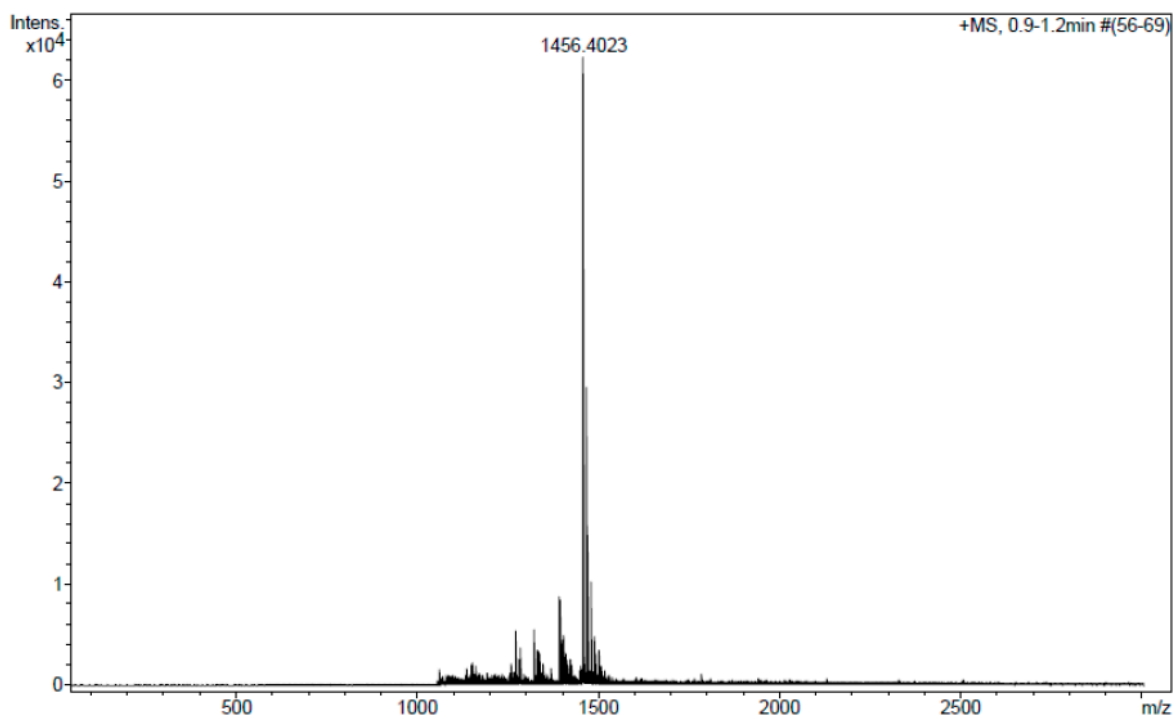

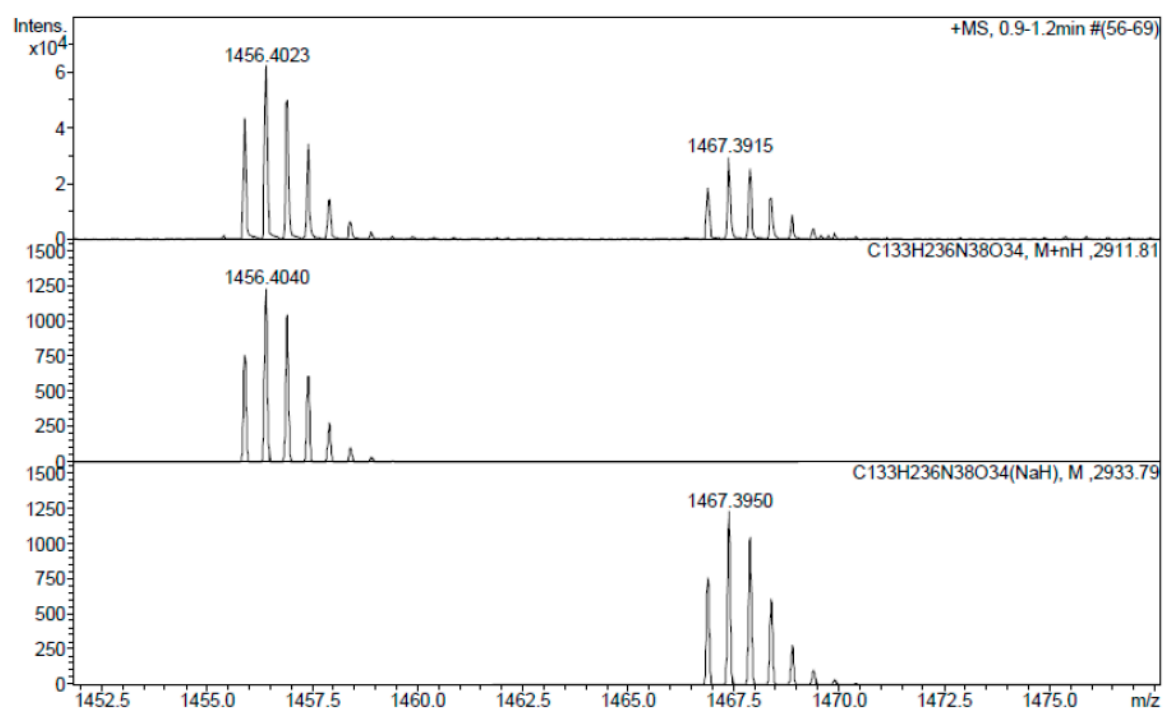

Supplement: s1 [file s1]
